# Supplementary material for: ETM-ANN Approach Application for Thiobenzamide and Quinolizidine Derivatives
Source: Hindawi journal article supplement (doi:10.1155/2010/693031), 2010-01-01
Supplement: f1 [file 693031.f1.pdf]

**Table 1.** Some descriptors of studied molecules calculated by B3LYP/6-31G(d,p)

| No | E <sub>HOMO</sub> (eV) | E <sub>LUMO</sub> (eV) | $\Delta E^1$ (eV) | $\mu$ (eV) | $\eta$ (eV) | s (eV <sup>-1</sup> ) | $\omega$ (eV) | Dipole Moment (D) | Polarizability (au) | E <sup>2</sup> (eV) | Activity, EC <sub>50</sub> (μg/mL) |
|----|------------------------|------------------------|-------------------|------------|-------------|-----------------------|---------------|-------------------|---------------------|---------------------|------------------------------------|
| 1  | -6.23                  | -0.83                  | 5.40              | -3.53      | 2.70        | 0.370                 | 2.308         | 4.688             | 201.866             | -34446.716          | 0.06                               |
| 2  | -5.57                  | -1.47                  | 4.10              | -3.52      | 2.05        | 0.488                 | 3.022         | 4.343             | 218.214             | -43837.695          | NA                                 |
| 3  | -5.39                  | -1.24                  | 4.15              | -3.32      | 2.08        | 0.482                 | 2.648         | 4.914             | 206.415             | -31331.256          | NA                                 |
| 4  | -5.37                  | -0.94                  | 4.43              | -3.16      | 2.21        | 0.451                 | 2.247         | 4.651             | 215.477             | -32400.419          | NA                                 |
| 5  | -5.35                  | -1.17                  | 4.18              | -3.26      | 2.09        | 0.478                 | 2.542         | 4.578             | 218.693             | -32400.500          | NA                                 |
| 6  | -5.52                  | -1.37                  | 4.15              | -3.45      | 2.08        | 0.482                 | 2.860         | 4.378             | 206.709             | -34031.715          | NA                                 |
| 7  | -5.63                  | -1.55                  | 4.08              | -3.59      | 2.04        | 0.490                 | 3.159         | 4.183             | 218.167             | -40502.313          | NA                                 |
| 8  | -5.33                  | -1.20                  | 4.13              | -3.27      | 2.06        | 0.484                 | 2.581         | 4.883             | 221.285             | -32400.500          | NA                                 |
| 9  | -5.31                  | -0.93                  | 4.38              | -3.12      | 2.19        | 0.457                 | 2.222         | 4.533             | 229.960             | -33469.663          | NA                                 |
| 10 | -5.32                  | -0.85                  | 4.47              | -3.09      | 2.24        | 0.447                 | 2.129         | 5.511             | 227.938             | -33469.663          | NA                                 |
| 11 | -5.31                  | -1.12                  | 4.19              | -3.22      | 2.10        | 0.477                 | 2.467         | 4.802             | 231.914             | -33469.718          | NA                                 |
| 12 | -5.21                  | -0.89                  | 4.32              | -3.05      | 2.16        | 0.463                 | 2.153         | 5.427             | 220.327             | -34446.716          | NA                                 |
| 13 | -6.14                  | -0.52                  | 5.62              | -3.33      | 2.81        | 0.356                 | 1.973         | 3.796             | 189.490             | -24590.122          | 0.05                               |
| 14 | -5.25                  | -0.99                  | 4.26              | -3.12      | 2.13        | 0.469                 | 2.285         | 5.341             | 208.909             | -33378.179          | 4.5                                |
| 15 | -5.96                  | -0.48                  | 5.48              | -3.22      | 2.74        | 0.365                 | 1.892         | 3.526             | 202.541             | -25659.340          | 0.03                               |
| 16 | -5.21                  | -0.95                  | 4.26              | -3.08      | 2.13        | 0.469                 | 2.227         | 5.114             | 221.965             | -34447.396          | 0.4                                |
| 17 | -5.43                  | -1.20                  | 4.23              | -3.32      | 2.12        | 0.473                 | 2.598         | 5.445             | 221.314             | -45884.618          | 0.9                                |
| 18 | -6.29                  | -0.92                  | 5.37              | -3.61      | 2.68        | 0.372                 | 2.420         | 5.819             | 202.737             | -32400.473          | 0.2                                |
| 19 | -5.60                  | -1.51                  | 4.09              | -3.56      | 2.05        | 0.489                 | 3.090         | 5.603             | 218.612             | -43837.695          | 0.02                               |
| 20 | -5.41                  | -1.27                  | 4.14              | -3.34      | 2.07        | 0.483                 | 2.695         | 5.902             | 206.868             | -31331.229          | 0.05                               |
| 21 | -5.39                  | -1.00                  | 4.39              | -3.20      | 2.20        | 0.456                 | 2.325         | 6.274             | 216.142             | -32400.419          | 0.065±0.035                        |
| 22 | -5.36                  | -1.22                  | 4.14              | -3.29      | 2.07        | 0.483                 | 2.615         | 5.448             | 219.254             | -32400.473          | 0.015±0.007                        |

|    |       |       |      |       |      |       |       |       |         |            |             |
|----|-------|-------|------|-------|------|-------|-------|-------|---------|------------|-------------|
| 23 | -5.53 | -1.41 | 4.12 | -3.47 | 2.06 | 0.485 | 2.923 | 5.634 | 207.330 | -34031.688 | 0.038       |
| 24 | -5.65 | -1.61 | 4.04 | -3.63 | 2.02 | 0.495 | 3.262 | 5.466 | 219.123 | -40502.313 | 0.09        |
| 25 | -5.35 | -1.23 | 4.12 | -3.29 | 2.06 | 0.485 | 2.627 | 5.985 | 221.665 | -32400.473 | NA          |
| 26 | -5.33 | -0.94 | 4.39 | -3.14 | 2.20 | 0.456 | 2.239 | 5.846 | 230.238 | -33469.636 | 0.15        |
| 27 | -5.35 | -0.94 | 4.41 | -3.15 | 2.20 | 0.454 | 2.243 | 5.773 | 229.057 | -33469.636 | 0.023±0.011 |
| 28 | -5.33 | -1.14 | 4.19 | -3.24 | 2.10 | 0.477 | 2.498 | 5.891 | 232.385 | -33469.691 | 0.03±0.07   |
| 29 | -5.21 | -0.81 | 4.40 | -3.01 | 2.20 | 0.455 | 2.059 | 6.019 | 220.888 | -34446.743 | 1.0         |
| 30 | -6.18 | -0.56 | 5.62 | -3.37 | 2.81 | 0.356 | 2.021 | 5.645 | 190.082 | -24590.122 | 25          |
| 31 | -5.25 | -1.00 | 4.25 | -3.13 | 2.12 | 0.471 | 2.298 | 6.959 | 209.719 | -33378.179 | 2           |
| 35 | -5.79 | -1.80 | 3.99 | -3.80 | 2.00 | 0.501 | 3.610 | 5.358 | 203.427 | -25659.312 | 2.5         |
| 36 | -5.82 | -2.61 | 3.21 | -4.22 | 1.60 | 0.623 | 5.535 | 6.839 | 222.728 | -34447.396 | NA          |
| 32 | -6.00 | -0.54 | 5.46 | -3.27 | 2.73 | 0.366 | 1.958 | 7.183 | 222.223 | -45884.618 | 0.15±0.071  |
| 33 | -5.22 | -0.92 | 4.30 | -3.07 | 2.15 | 0.465 | 2.192 | 6.196 | 223.645 | -33841.262 | 0.5         |
| 34 | -5.44 | -1.19 | 4.25 | -3.32 | 2.12 | 0.471 | 2.586 | 5.788 | 224.483 | -36895.850 | 1.8         |
| 37 | -5.55 | -1.55 | 4.00 | -3.55 | 2.00 | 0.500 | 3.151 | 6.039 | 237.697 | -37531.100 | NA          |
| 38 | -5.69 | -0.76 | 4.93 | -3.23 | 2.46 | 0.406 | 2.110 | 3.037 | 217.341 | -38029.477 | 1-3         |
| 39 | -5.61 | -0.37 | 5.24 | -2.99 | 2.62 | 0.382 | 1.706 | 3.108 | 227.124 | -39097.606 | NA          |
| 40 | -5.64 | -0.60 | 5.04 | -3.12 | 2.52 | 0.397 | 1.931 | 2.272 | 210.664 | -35982.364 | NA          |
| 41 | -5.79 | -0.90 | 4.89 | -3.35 | 2.44 | 0.409 | 2.288 | 5.019 | 193.240 | -24016.996 | 1.6-3.1     |
| 42 | -5.43 | -0.49 | 4.94 | -2.96 | 2.47 | 0.405 | 1.774 | 4.677 | 206.585 | -25523.011 | NA          |
| 43 | -5.77 | -1.14 | 4.63 | -3.46 | 2.32 | 0.432 | 2.578 | 4.734 | 193.871 | -26717.373 | 0.4-0.8     |
| 44 | -5.72 | -1.23 | 4.49 | -3.48 | 2.24 | 0.445 | 2.689 | 4.658 | 204.948 | -36523.435 | 0.8         |
| 45 | -5.86 | -1.19 | 4.67 | -3.53 | 2.34 | 0.428 | 2.661 | 4.637 | 212.752 | -93980.543 | 0.8         |
| 46 | -5.61 | -0.86 | 4.75 | -3.24 | 2.38 | 0.421 | 2.203 | 5.025 | 205.793 | -25086.186 | 0.2-0.3     |
| 47 | -5.26 | -0.91 | 4.35 | -3.09 | 2.18 | 0.460 | 2.188 | 4.777 | 211.977 | -27132.401 | 0.6         |
| 48 | -5.31 | -0.95 | 4.36 | -3.13 | 2.18 | 0.459 | 2.247 | 4.482 | 198.384 | -26063.647 | NA          |

|    |       |       |      |       |      |       |       |       |         |            |       |
|----|-------|-------|------|-------|------|-------|-------|-------|---------|------------|-------|
| 49 | -5.73 | -1.28 | 4.45 | -3.51 | 2.22 | 0.449 | 2.761 | 4.522 | 206.365 | -33188.107 | NA    |
| 50 | -6.00 | -1.24 | 4.76 | -3.62 | 2.38 | 0.420 | 2.753 | 5.018 | 223.292 | -26122.342 | 2     |
| 51 | -5.61 | -1.23 | 4.38 | -3.42 | 2.19 | 0.457 | 2.670 | 4.988 | 223.443 | -28468.318 | 0.5   |
| 52 | -5.61 | -0.86 | 4.75 | -3.24 | 2.38 | 0.421 | 2.203 | 5.357 | 238.473 | -28293.376 | NA    |
| 53 | -5.55 | -0.97 | 4.58 | -3.26 | 2.29 | 0.437 | 2.320 | 5.182 | 260.960 | -30302.366 | NA    |
| 54 | -5.75 | -1.58 | 4.17 | -3.67 | 2.08 | 0.480 | 3.221 | 6.949 | 269.471 | -33385.907 | NA    |
| 55 | -5.71 | -0.79 | 4.92 | -3.25 | 2.46 | 0.407 | 2.147 | 5.107 | 207.681 | -25086.240 | 4     |
| 56 | -6.05 | -1.52 | 4.53 | -3.79 | 2.26 | 0.442 | 3.163 | 5.905 | 236.566 | -40974.621 | NA    |
| 57 | -5.40 | -1.43 | 3.97 | -3.42 | 1.98 | 0.504 | 2.938 | 5.441 | 243.748 | -28196.612 | NA    |
| 58 | -5.57 | -1.30 | 4.27 | -3.44 | 2.14 | 0.468 | 2.763 | 4.466 | 236.051 | -28196.530 | NA    |
| 59 | -5.53 | -0.78 | 4.75 | -3.16 | 2.38 | 0.421 | 2.096 | 5.435 | 281.753 | -32537.428 | NA    |
| 60 | -5.66 | -0.80 | 4.86 | -3.23 | 2.43 | 0.412 | 2.147 | 4.878 | 206.332 | -25086.240 | 8     |
| 61 | -5.79 | -1.50 | 4.29 | -3.65 | 2.14 | 0.466 | 3.097 | 6.677 | 218.098 | -49029.765 | 10-20 |
| 62 | -5.42 | -0.79 | 4.63 | -3.11 | 2.32 | 0.432 | 2.082 | 5.410 | 198.501 | -26063.483 | NA    |
| 63 | -5.74 | -0.99 | 4.75 | -3.37 | 2.38 | 0.421 | 2.384 | 4.229 | 194.494 | -26717.536 | 10    |
| 64 | -5.27 | -0.62 | 4.65 | -2.95 | 2.32 | 0.430 | 1.865 | 2.306 | 197.190 | -23475.979 | 5-10  |
| 65 | -5.83 | -1.05 | 4.78 | -3.44 | 2.39 | 0.418 | 2.476 | 6.665 | 223.564 | -27628.900 | NA    |

$$^1\Delta E^1 = E_{\text{HOMO}} - E_{\text{LUMO}}$$

<sup>2</sup>Sum of electronic and zero-point Energies

**Table 2.** Mulliken charges on some atoms of studied molecules calculated by B3LYP/6-31G(d,p)

| No | C <sub>1</sub> | C <sub>2</sub> | C <sub>3</sub> | C <sub>4</sub> | C <sub>5</sub> | C <sub>6</sub> | C <sub>8</sub> | N <sub>9</sub> | (O/S) <sub>39</sub> |
|----|----------------|----------------|----------------|----------------|----------------|----------------|----------------|----------------|---------------------|
| 1  | 0.007          | -0.095         | -0.089         | -0.093         | -0.130         | 0.348          | 0.107          | -0.444         | -0.263              |
| 2  | 0.080          | -0.102         | -0.087         | -0.064         | -0.102         | -0.074         | 0.073          | -0.451         | -0.239              |
| 3  | 0.081          | 0.106          | 0.088          | 0.079          | 0.091          | 0.091          | 0.075          | 0.453          | -0.254              |
| 4  | 0.023          | -0.094         | -0.090         | -0.076         | -0.128         | 0.119          | 0.071          | -0.444         | -0.260              |
| 5  | 0.084          | -0.111         | -0.086         | -0.115         | 0.116          | -0.127         | 0.075          | -0.452         | -0.258              |
| 6  | 0.077          | 0.105          | 0.090          | 0.132          | 0.352          | 0.146          | 0.075          | 0.451          | -0.243              |
| 7  | 0.071          | -0.094         | -0.093         | -0.092         | -0.049         | -0.106         | -0.075         | -0.452         | -0.237              |
| 8  | 0.082          | -0.106         | -0.123         | 0.129          | -0.125         | -0.092         | 0.074          | -0.453         | -0.258              |
| 9  | 0.021          | -0.094         | -0.127         | 0.137          | -0.168         | 0.124          | 0.071          | -0.444         | -0.263              |
| 10 | 0.025          | -0.133         | 0.123          | -0.111         | -0.127         | 0.115          | 0.715          | -0.444         | -0.262              |
| 11 | 0.089          | -0.150         | 0.124          | -0.148         | 0.119          | -0.134         | 0.072          | -0.450         | -0.258              |
| 12 | 0.011          | -0.094         | -0.089         | -0.092         | -0.131         | 0.346          | 0.106          | -0.446         | -0.265              |
| 13 | 0.013          | -0.125         | -0.103         | -0.082         | -0.103         | 0.302          | 0.549          | -0.543         | -0.569              |
| 14 | 0.068          | -0.117         | -0.097         | -0.083         | -0.101         | 0.294          | 0.080          | -0.469         | -0.278              |
| 15 | 0.019          | -0.170         | 0.115          | -0.118         | -0.100         | 0.296          | 0.548          | -0.542         | -0.578              |
| 16 | 0.075          | -0.163         | 0.122          | -0.118         | -0.098         | 0.287          | 0.079          | -0.469         | -0.281              |
| 17 | 0.071          | -0.103         | -0.107         | -0.069         | -0.098         | 0.297          | 0.082          | -0.468         | -0.266              |
| 18 | 0.082          | -0.111         | -0.086         | -0.115         | 0.117          | -0.123         | 0.078          | -0.454         | -0.261              |
| 19 | 0.073          | -0.099         | -0.087         | -0.064         | -0.103         | -0.070         | 0.083          | -0.463         | -0.250              |
| 20 | 0.083          | -0.106         | -0.088         | -0.079         | -0.089         | -0.089         | 0.075          | -0.452         | -0.256              |
| 21 | 0.021          | -0.093         | -0.090         | -0.077         | -0.127         | 0.122          | 0.072          | -0.444         | -0.262              |
| 22 | 0.084          | -0.112         | -0.087         | -0.112         | 0.116          | -0.125         | 0.077          | -0.454         | -0.261              |
| 23 | 0.076          | -0.106         | -0.090         | -0.132         | 0.352          | 0.143          | 0.078          | -0.453         | -0.247              |
| 24 | 0.073          | -0.095         | -0.093         | -0.091         | -0.048         | -0.104         | 0.074          | -0.452         | -0.239              |
| 25 | 0.083          | -0.107         | -0.124         | 0.130          | -0.123         | -0.089         | 0.074          | -0.453         | -0.261              |
| 26 | 0.021          | -0.094         | -0.127         | 0.137          | -0.166         | 0.127          | 0.072          | -0.444         | -0.265              |
| 27 | 0.025          | -0.132         | 0.122          | -0.112         | -0.126         | 0.118          | 0.072          | -0.444         | -0.264              |
| 28 | 0.087          | -0.152         | 0.126          | -0.148         | 0.120          | -0.130         | 0.076          | -0.453         | -0.262              |
| 29 | 0.021          | -0.095         | -0.091         | -0.092         | -0.134         | 0.344          | 0.103          | -0.447         | -0.275              |
| 30 | 0.013          | -0.123         | -0.104         | -0.083         | -0.103         | 0.302          | 0.552          | -0.545         | -0.580              |
| 31 | 0.067          | -0.115         | -0.097         | -0.083         | -0.101         | 0.294          | 0.08           | -0.469         | -0.276              |
| 32 | 0.019          | -0.169         | 0.115          | -0.118         | -0.100         | 0.296          | 0.550          | -0.543         | -0.579              |
| 33 | 0.075          | -0.162         | 0.122          | -0.118         | -0.098         | 0.288          | 0.080          | -0.469         | -0.282              |
| 34 | 0.070          | -0.100         | -0.108         | -0.070         | -0.098         | 0.298          | 0.083          | -0.468         | -0.266              |
| 35 | 0.074          | -0.093         | -0.090         | -0.072         | 0.095          | -0.083         | 0.075          | -0.455         | -0.233              |
| 36 | 0.057          | -0.084         | -0.099         | -0.083         | 0.234          | -0.089         | 0.081          | -0.459         | -0.231              |

|    |        |        |        |        |        |        |       |        |        |
|----|--------|--------|--------|--------|--------|--------|-------|--------|--------|
| 37 | 0.065  | -0.078 | -0.101 | -0.091 | 0.013  | -0.115 | 0.086 | -0.458 | -0.261 |
| 38 | 0.010  | -0.129 | -0.154 | 0.334  | -0.141 | 0.302  | 0.620 | -0.568 | -0.604 |
| 39 | -0.007 | -0.116 | -0.143 | 0.325  | -0.151 | 0.327  | 0.544 | -0.541 | -0.528 |
| 40 | 0.037  | -0.117 | -0.148 | 0.326  | -0.116 | -0.101 | 0.568 | -0.563 | -0.534 |
| 41 | 0.012  | -0.137 | -0.100 | -0.083 | -0.103 | 0.301  | 0.616 | -0.563 | -0.597 |
| 42 | 0.003  | -0.142 | -0.126 | 0.298  | -0.146 | 0.300  | 0.613 | -0.568 | -0.607 |
| 43 | 0.013  | -0.198 | 0.342  | -0.135 | -0.105 | 0.304  | 0.621 | -0.563 | -0.595 |
| 44 | 0.014  | -0.120 | -0.113 | -0.070 | -0.099 | 0.306  | 0.622 | -0.563 | -0.594 |
| 45 | 0.012  | -0.141 | 0.039  | -0.088 | -0.102 | 0.308  | 0.624 | -0.563 | -0.595 |
| 46 | 0.019  | -0.180 | 0.119  | -0.119 | -0.100 | 0.295  | 0.617 | -0.564 | -0.599 |
| 47 | 0.014  | -0.180 | 0.344  | -0.129 | -0.116 | 0.300  | 0.616 | -0.562 | -0.595 |
| 48 | 0.012  | -0.162 | 0.318  | -0.128 | -0.108 | 0.298  | 0.615 | -0.562 | -0.596 |
| 49 | 0.006  | -0.156 | -0.053 | -0.097 | -0.106 | 0.312  | 0.631 | -0.565 | -0.599 |
| 50 | 0.017  | -0.200 | 0.131  | -0.121 | -0.103 | 0.301  | 0.624 | -0.565 | -0.600 |
| 51 | 0.006  | -0.152 | 0.256  | -0.092 | -0.116 | 0.309  | 0.624 | -0.563 | -0.595 |
| 52 | 0.013  | -0.142 | -0.134 | 0.153  | -0.157 | 0.293  | 0.620 | -0.567 | -0.602 |
| 53 | 0.010  | -0.174 | 0.058  | -0.115 | -0.108 | 0.302  | 0.619 | -0.564 | -0.597 |
| 54 | 0.002  | -0.174 | 0.035  | -0.094 | -0.107 | 0.311  | 0.625 | -0.565 | -0.598 |
| 55 | 0.009  | -0.135 | -0.131 | 0.129  | -0.145 | 0.303  | 0.619 | -0.565 | -0.602 |
| 56 | 0.023  | -0.132 | -0.133 | 0.297  | -0.118 | 0.305  | 0.627 | -0.566 | -0.595 |
| 57 | 0.016  | -0.203 | 0.103  | 0.113  | -0.173 | 0.307  | 0.615 | -0.559 | -0.589 |
| 58 | -0.059 | 0.067  | 0.095  | -0.123 | -0.099 | 0.303  | 0.592 | -0.554 | -0.597 |
| 59 | 0.021  | -0.187 | 0.091  | 0.096  | -0.150 | 0.290  | 0.619 | -0.566 | -0.600 |
| 60 | 0.024  | -0.143 | -0.095 | -0.122 | 0.092  | 0.260  | 0.617 | -0.565 | -0.601 |
| 61 | 0.018  | -0.118 | -0.110 | -0.056 | -0.140 | 0.339  | 0.627 | -0.563 | -0.592 |
| 62 | 0.024  | -0.117 | -0.100 | -0.124 | 0.303  | 0.263  | 0.597 | -0.582 | -0.546 |
| 63 | -0.063 | 0.301  | -0.141 | -0.087 | -0.102 | 0.303  | 0.646 | -0.577 | -0.606 |
| 64 | 0.022  | -0.143 | -0.103 | -0.084 | -0.116 | 0.275  | 0.585 | -0.556 | -0.566 |
| 65 | 0.018  | -0.142 | -0.088 | -0.093 | -0.094 | 0.285  | 0.582 | -0.549 | -0.548 |

**Table 3.** Fukui functions of studied molecules calculated by B3LYP/6-31G(d,p)

[illegible]







[illegible]
